# Supplementary material for: A Novel Homozygous Nonsense Variant in the DYM Underlies Dyggve-Melchior-Clausen Syndrome in Large Consanguineous Family
Source: MDPI journal article supplement (doi:10.3390/genes14020510), 2023-02-17
Supplement: s1 [file s1]

**Table S1: Primers sequences used to amplify and sequence DYM coding regions**

| Primer Name | Forward (5'-3')          | Reverse (5'-3')            |
|-------------|--------------------------|----------------------------|
| Exon_2_DYM  | CTGGCCTAGCCCCATATT       | TCTTTTGGATTTTCTACTGATCTATG |
| Exon_3_DYM  | CCCCAAGCTCTTCTCTTTAGG    | ATGGCTTAGCAGAGTCCATTACC    |
| Exon_4_DYM  | GCAGCAGTTTCTCTCATTGC     | TCTCACCCCAGTGACTTAGAC      |
| Exon_5_DYM  | AGGATGGACAAAACGGTTG      | CTTCAACCCCACCAGCTT         |
| Exon_6_DYM  | CGTACAGGAGCCTAAAGTACC    | CAGAGATTAATTCTGTGCCTACC    |
| Exon_7_DYM  | GATAACTAACCCAAATACACCAGC | CTATGCACTGGGTTTAAAGAGAC    |
| Exon_8_DYM  | TGCAGTGCTCAATTTCTGTGAG   | CAGCTGCACAAATTCAATGTAAC    |
| Exon_9_DYM  | CTGGCCTTGTAATGTATAGAC    | GGATCAGATATAAAGGATGCTTG    |
| Exon_10_DYM | GAATCTGAAATGTAGTGACTTTCC | ACGAGTTCCTGGGTGCAGC        |
| Exon_11_DYM | GAGCCTAAATGGTCCTTGCAAG   | GGTTCTCACAGGAACATCTACCA    |
| Exon_12_DYM | ATTTGCGTGGCCTCTGTCT      | TGTCACGAGAATTTTAGCATCC     |
| Exon_13_DYM | GGGGCTATTGCAGATACACATT   | AAGATGGATACTATGGTGGTTCCT   |
| Exon_14_DYM | CTTGCTGTTAACACAGGCATGAA  | ACAGTAAAATCTTGAGAAGAGAGGG  |
| Exon_15_DYM | TGAGCTTCTTCTCTTCATGATCT  | ACACACACAGATTACCACAATAT    |
| Exon_16_DYM | GTGAATTAAAAGCCGGGTCA     | TGGCACTGAGTCACACTATGG      |
| Exon_17_DYM | ACCAGGACCCATTGTGTTACT    | TAAAGAGGATTGCACGAGTGTGT    |
